# Supplementary material for: Patterns of postmeal insulin secretion in individuals with sulfonylurea-treated KCNJ11 neonatal diabetes show predominance of non-KATP-channel pathways
Source: PubMed Central journal article supplement (PMC6936449; doi:10.1136/bmjdrc-2019-000721), 2019-12-18
Supplement: bmjdrc-2019-000721supp002.pdf [file bmjdrc-2019-000721supp002.pdf]

Supplementary Table 1. Incremental area under the curve (iAUC) for glucose, insulin and glucagon after different meals in *KCNJ11* cases and controls.

| <b>Outcome</b>         | <b>Group</b> | <b>Carb</b>     | <b>Protein</b>       | <b>No food</b>   | <b>P-value carb vs protein</b> | <b>P-value protein vs no food</b> | <b>P-value carb vs no food</b> |
|------------------------|--------------|-----------------|----------------------|------------------|--------------------------------|-----------------------------------|--------------------------------|
| Glucose iAUC (mmol/L)  | Cases        | 16.7 (8.3-31.6) | -10.9 (-29.1 - -2.2) | -7.6 (-11.8-3.9) | 0.04                           | 0.22                              | 0.04                           |
|                        | Controls     | 1.00 (-0.7-3.3) | -1.15 (-1.5- -0.9)   | N/A              | 0.04                           | N/A                               | N/A                            |
| Insulin iAUC (pmol/L)  | Cases        | 205 (104-480)   | 183 (109-316)        | 39 (13-101)      | 0.69                           | 0.04                              | 0.04                           |
|                        | Controls     | 472 (230-992)   | 70 (8-310)           | N/A              | 0.04                           | N/A                               | N/A                            |
| Glucagon iAUC (pmol/L) | Cases        | 0.5 (0.1-1.2)   | 11.8 (2.2-16.7)      | 0.2 (-0.2-1.9)   | 0.04                           | 0.04                              | 0.50                           |
|                        | Controls     | 0.3 (-2.8-1.7)  | 18.4 (-6.9-26.3)     | N/A              | 0.14                           | N/A                               | N/A                            |
