# Supplementary material for: Patterns of postmeal insulin secretion in individuals with sulfonylurea-treated KCNJ11 neonatal diabetes show predominance of non-KATP-channel pathways
Source: PubMed Central journal article supplement (PMC6936449; doi:10.1136/bmjdrc-2019-000721), 2019-12-18

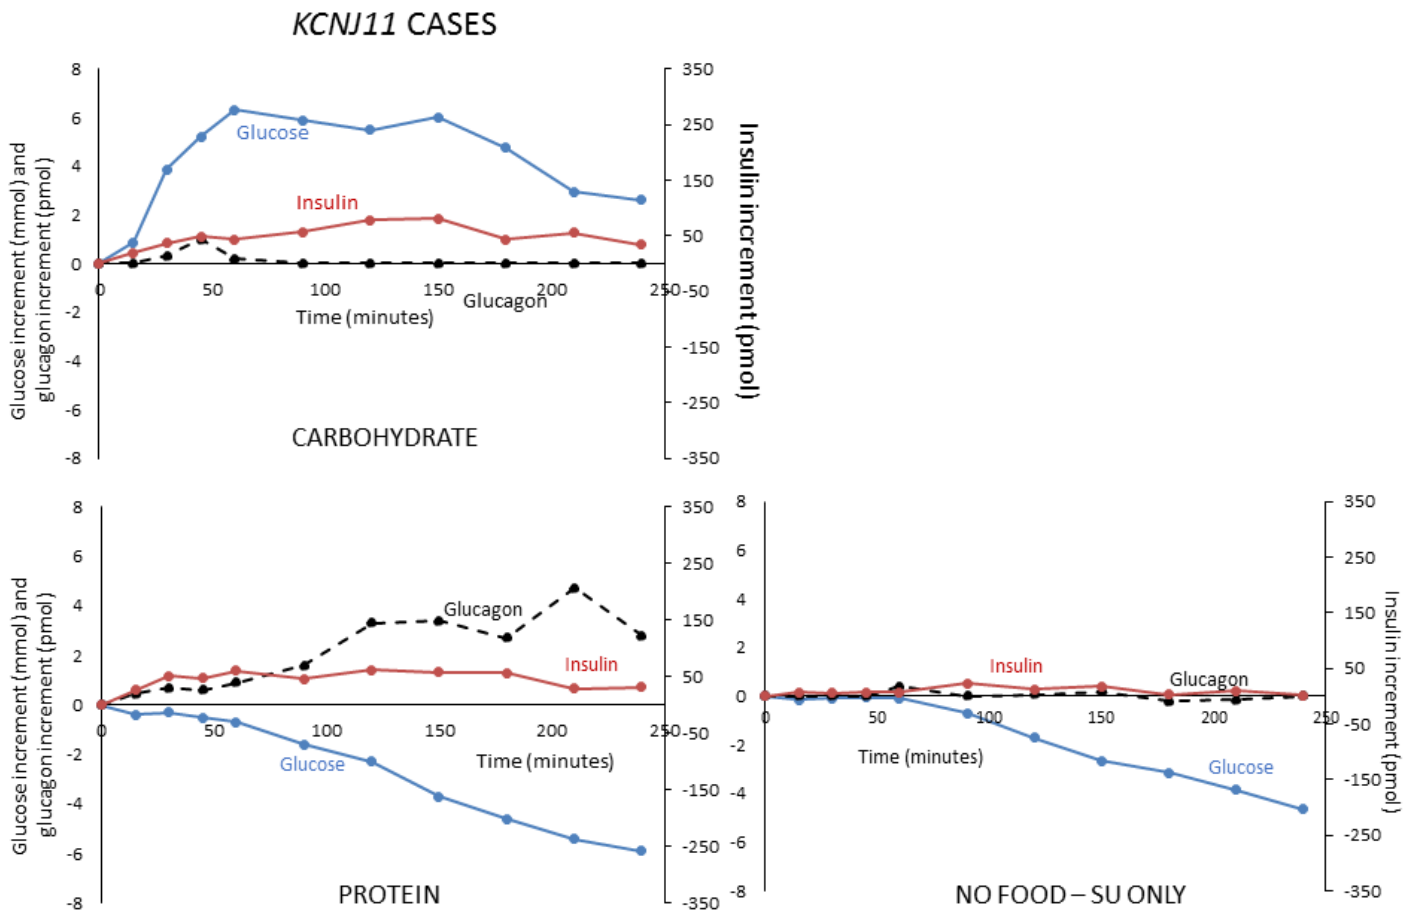

Supplement: bmjdrc-2019-000721supp005.pdf [file bmjdrc-2019-000721supp005.pdf]
